# Supplementary material for: LINC01393, a Novel Long Non-Coding RNA, Promotes the Cell Proliferation, Migration and Invasion through MiR-128-3p/NUSAP1 Axis in Glioblastoma
Source: MDPI journal article supplement (doi:10.3390/ijms24065878), 2023-03-20

Figure S1. Protein coding ability prediction of LINC01393 by *InterPro*.

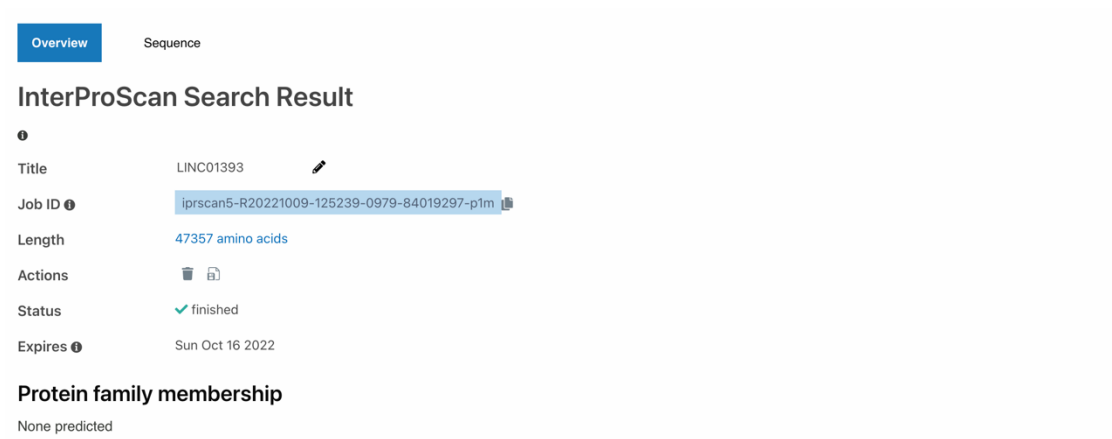

Figure S2. Representative axial T2-weighted MR images at 8 days.

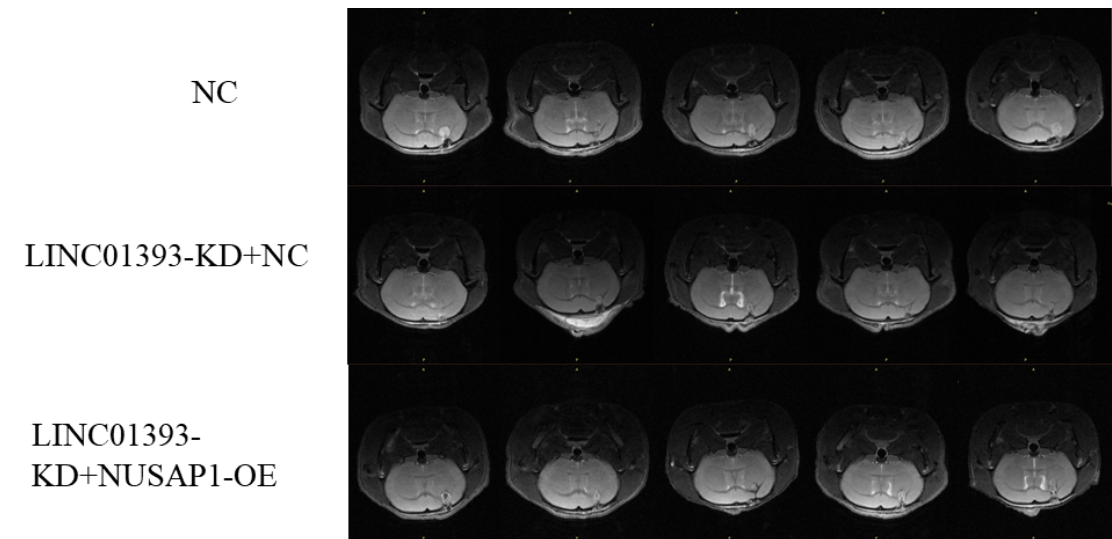

Figure S3. LINC01393 expression in pan-cancer tissues and paired non-tumor samples from TCGA database.

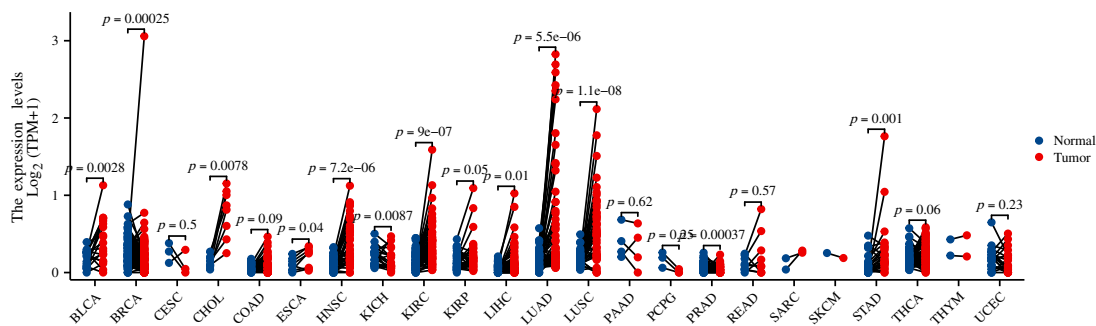

Supplement: s1 [file s1]
